# Supplementary material for: Amplification-free whole-genome bisulfite sequencing by post-bisulfite adaptor tagging
Source: PubMed Central journal article supplement — Nucleic Acids Res. 2012 May 30;40(17):e136. doi: 10.1093/nar/gks454 (PMC3458524; doi:10.1093/nar/gks454), 2012-05-30
Supplement: supp_gks454_nar-02274-met-k-2011-File006.pdf [file supp_gks454_nar-02274-met-k-2011-File006.pdf]

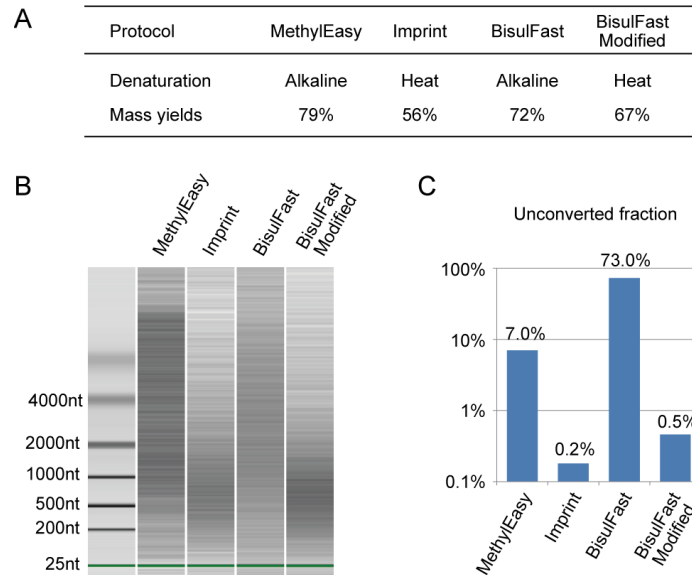

**Supplementary Figure S1.** Effect of DNA denaturation procedure on the efficiency of bisulfite conversion.

**(A)** Yield of DNA in bisulfite conversion. We used “MethylEasy” Xceed Rapid DNA Bisulphite Modification Kit (Human Genetic Signatures), “Imprint” bisulfite DNA modification kit (Sigma) and “BisulFast” DNA modification kit (Toyobo) according to the manufacturer's instructions. For the protocol indicated as “BisulFast, Modified”, we omitted the alkaline denaturation step and instead denatured the genomic DNA dissolved in bisulfite salt solution by heating at 99 °C for 6 min. “Alkaline” and “Heat” indicate the denaturation procedure used. “Mass yields” indicates the amount of obtained DNA, concentration of which was fluorometrically determined using Qubit ssDNA Assay Kit (Invitrogen) and Qubit fluorometer (Invitrogen), according to the manufacturer’s instruction.

**(B)** Size distribution of bisulfite-treated DNA. DNAs subjected to heat denaturation were much more prominently fragmented than those subjected to alkaline denaturation. Electrophoresis was performed on Bioanalyzer 2100 (Agilent) using RNA 6000 pico kit (Agilent).

**(C)** PCR quantification of a region extremely refractory to bisulfite conversion. During the development of PBAT method, we noticed that several regions in the *A. thaliana* chloroplast genome appear to be highly methylated. Since the chloroplast DNA is known to escape methylation, it is likely that these regions are exceptionally refractory to bisulfite conversion. We thus used one of them as a model to identify conditions for efficient conversion. Primers used for qPCR to amplify the unconverted fragment were 5'-CCC CAT AGG CTT TCG CTT TCG CGT CTC TCT-3' and 5'-TAG AGA ATT TGT GCG CTT GGG AGT CCC TGA-3'. We used serially diluted, untreated genomic DNA as a standard to determine the amount of unconverted DNA. These results indicated that heat denaturation results in slightly lower DNA recovery and much higher conversion rate than those with alkaline denaturation, presumably because the former induces much more prominent DNA fragmentation than the latter, thereby facilitating efficient denaturation and conversion.

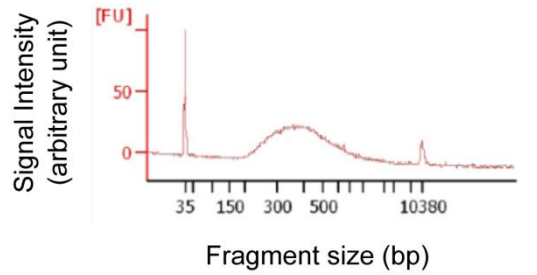

**Supplementary Figure S2.** Typical size distribution of template DNA prepared by the PBAT method. Sequencing template DNA after the size fractionation with AMPure SPRI beads (see Materials and Methods) was electrophoresed by Bioanalyzer 2100 (Agilent) with High Sensitivity DNA Kit (Agilent). As intended, DNAs smaller than 200 bp were effectively removed.

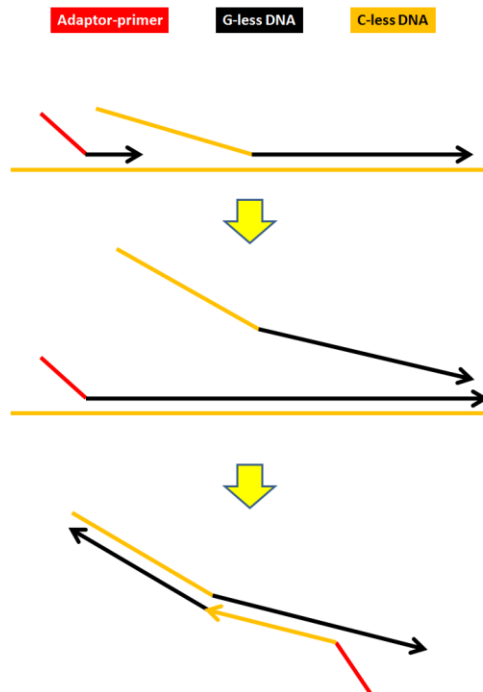

**Supplementary Figure S3.** A plausible mechanism to generate reads derived from the opposite strand. Bisulfite treatment makes all the genomic DNA C-poor (colored in orange). During the first strand synthesis step in the PBAT method, not only the adaptor primer (red) but also the bisulfite-treated genomic DNA itself may prime the synthesis of complementary G-poor DNA (black) (*top*). If such a genomic DNA-primed strand is displaced by DNA polymerase extending another product (*middle*), then the displaced strand can serve as a template for the synthesis of C-poor DNA from the adaptor-primer (*bottom*), leading to reads derived from the unintended strand of genomic DNA occasionally found in the PBAT data.

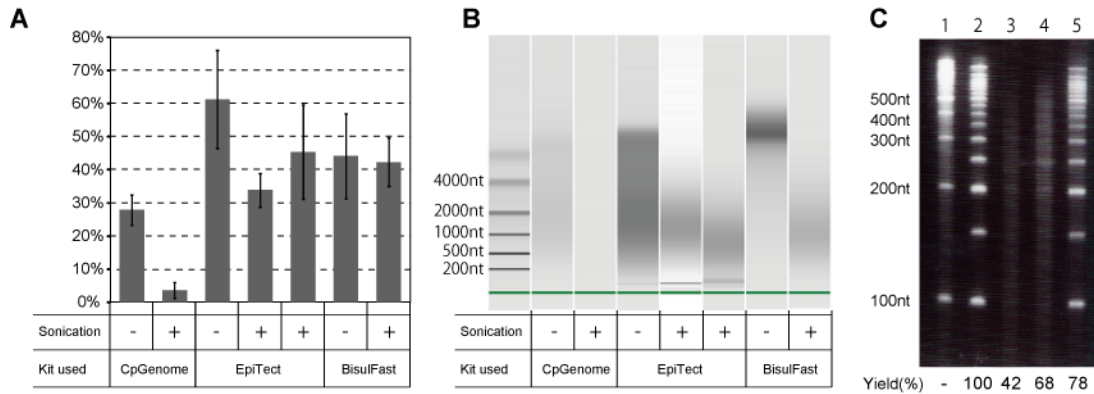

**Supplementary Figure S4.** Bisulfite-induced DNA loss and fragmentation.

**(A)** DNA loss by bisulfite treatment. Genomic DNA (100 ng) was bisulfite-treated and purified using 3 commercially available kits according to the manufacturers' instructions. To examine the effect of pre-fragmentation on DNA recovery, we prepared genomic DNA samples subjected to sonication-mediated fragmentation. For the bisulfite treatment of fragmented DNA using EpiTect, we tested both the standard protocol (*middle*) and the protocol for degraded DNA (*right*). Concentration of each DNA was fluorometrically determined using Quant-iT single stranded DNA Kit (Life technologies) and Qubit fluorometer (Invitrogen). Note that pre-fragmentation tends to reduce the yield of DNA.

**(B)** Size distribution of bisulfite-treated DNA. Samples quantified as above were electrophoresed by Bioanalyzer 2100 (Agilent) with RNA 6000 Pico RNA kit (Agilent).

**(C)** Bisulfite-induced DNA fragmentation. A DNA size standard (50-bp ladder, NEB) was bisulfite-treated, fluorometrically quantified and electrophoresed on a denaturing 6% polyacrylamide gel. Lane 1; 100-bp ladder (Bioneer), lane 2; input 50-bp ladder, lane 3; 50-bp ladder subjected to heat denaturation followed by bisulfite treatment and on-column desulfonation, lane 4; 50-bp ladder subjected to alkaline denaturation followed by bisulfite-treatment and on-column desulfonation, lane 5; 50-bp ladder subjected only to denaturation and mock on-column desulfonation. Note that heat denaturation led to more prominent DNA fragmentation than alkaline denaturation (see also Supplementary Figure S1).

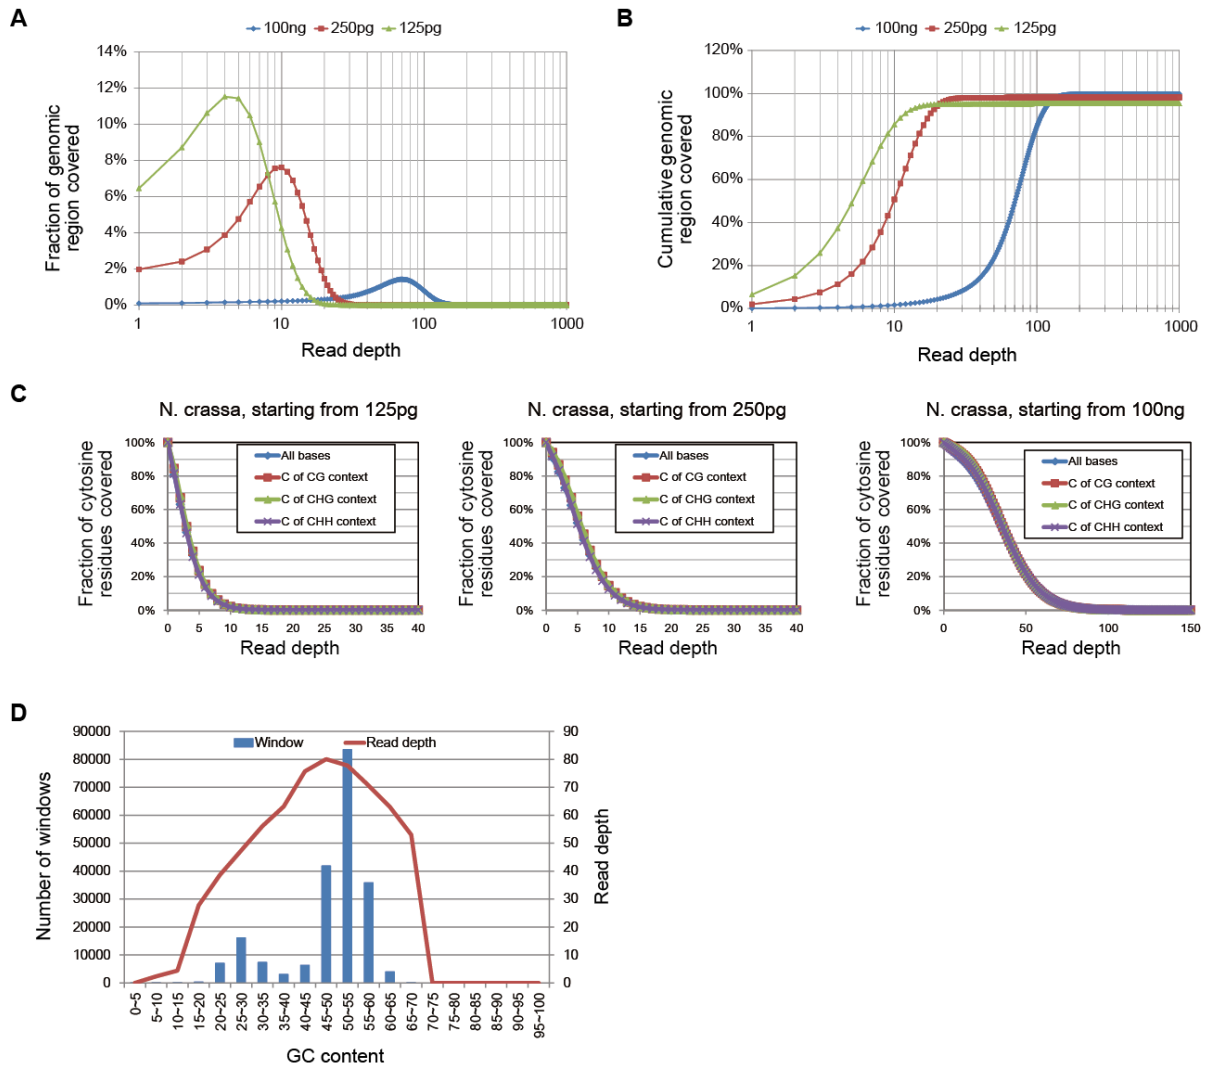

**Supplementary Figure S5.** *N. crassa* methylome determined by PBAT.

**(A)** Coverage of the *N. crassa* genome. The percent of the genome covered at the indicated read depth is shown for the PBAT data obtained from 100 ng, 250 pg and 125 pg of input DNA (Supplementary Table S1). Note that 6.5% of the templates generated from 100 ng of DNA (*i.e.*, equivalent to 6.5 ng of input DNA) was used for sequencing, whereas all the templates generated from 250 pg and 125 pg of DNA were sequenced.

**(B)** Cumulative coverage of the *N. crassa* genome. The percent of the genome covered by differing maximum depth of reads is shown for the three datasets.

**(C)** Strand-specific base coverage. The percent of all bases and cytosine residues in the indicated context covered by differing minimum number of reads is shown for the three datasets.

**(D)** GC content and median read depth were calculated for each of the 1,000-bp moving window with a step size of 200 bp in the genome. The bar and line plot indicate the number and relative read depth of windows with indicated GC content of the original genome sequence, respectively.

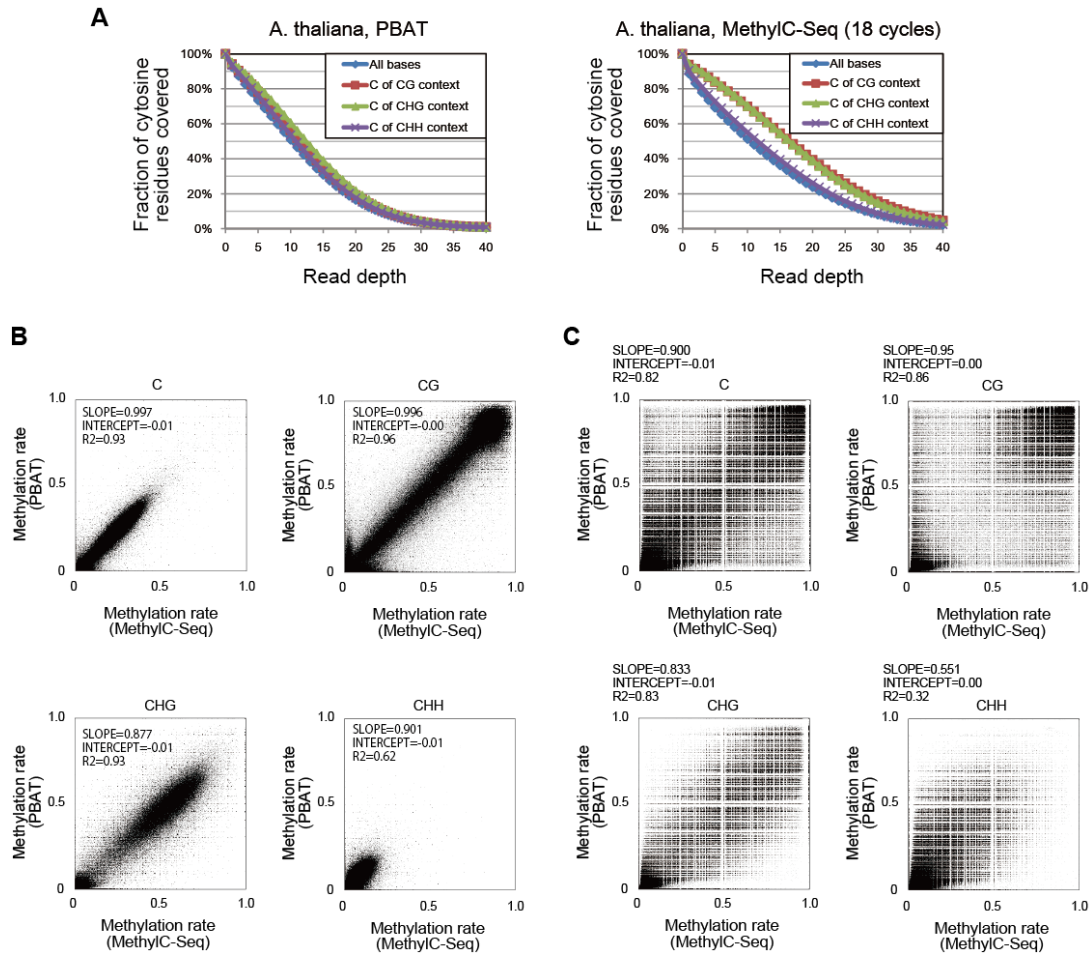

**Supplementary Figure S6.** Comparison of PBAT and MethylC-Seq data on the *A. thaliana* methylome.

(A) Strand-specific base coverage. The percent of all bases and cytosine residues in the indicated context covered by differing minimum number of reads is shown for the PBAT and MethylC-Seq data (Supplementary Table S2).

(B) The moving averages (window size, 1000 bp; step size, 200 bp) of methylation rate in the indicated sequence context were calculated from the PBAT and MethylC-Seq data and plotted for comparison.

(C) Methylation rate of each cytosine residue in the indicated sequence context was calculated from the two datasets and plotted for comparison. Note that the single nucleotide-level analysis is much more sensitive to fluctuation of the data, especially for the residues with lower coverage, than the window-based analysis, because the latter takes the average of all C residues in the window to buffer the effect of fluctuation. Thus, the single nucleotide level analysis inevitably leads to much wider scatter around the diagonal than the window-based analysis.

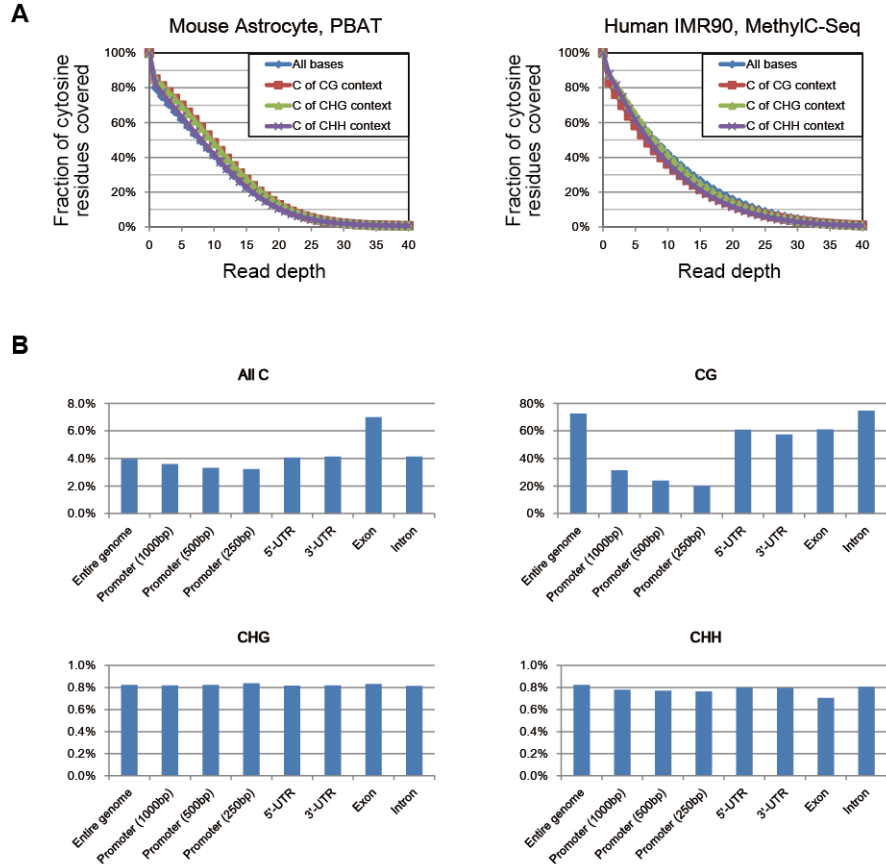

**Supplementary Figure S7. Mouse astrocyte methylome determined by PBAT.**

**(A)** Strand-specific base coverage. The percent of all bases and cytosine residues in the indicated context covered by differing minimum number of reads is shown for the mouse PBAT and human MethylC-Seq datasets (Supplementary Table S3).

**(B)** Methylation levels at the entire mouse genome and annotated genomic loci. Promoters were defined as 1000, 500 and 250 bp region upstream of transcriptional start sites. UTR; untranslated region.

M. musculus, mm9, chr7, 149758001~ 149770000

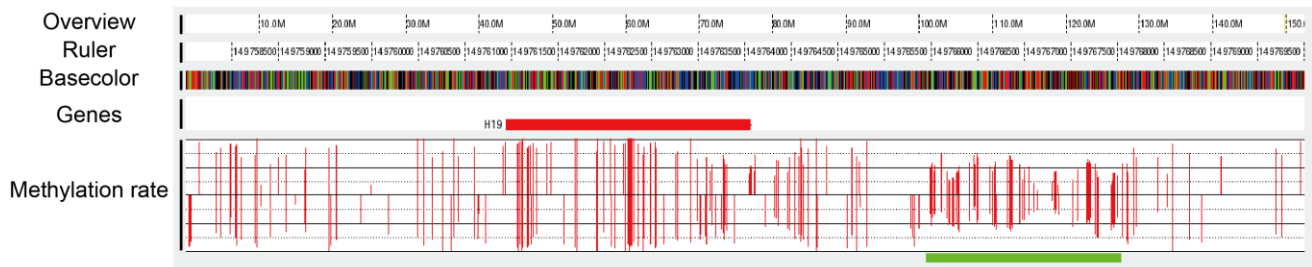

M. musculus, mm9, chr6, 4688001~ 4715000

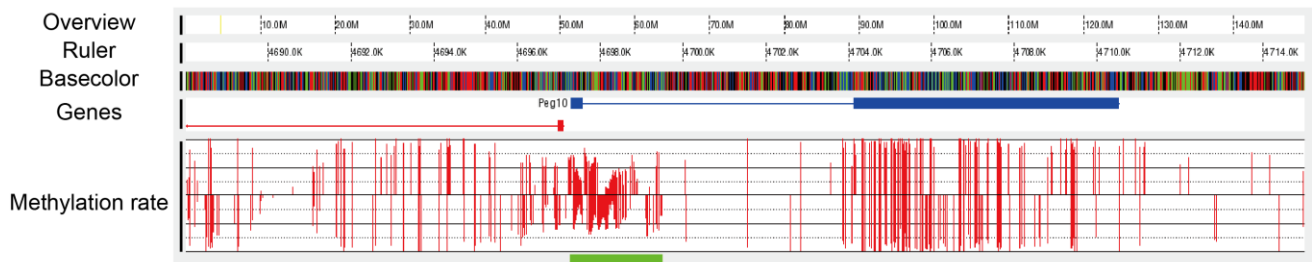

M. musculus, mm9, chr7, 6685001~ 6655000

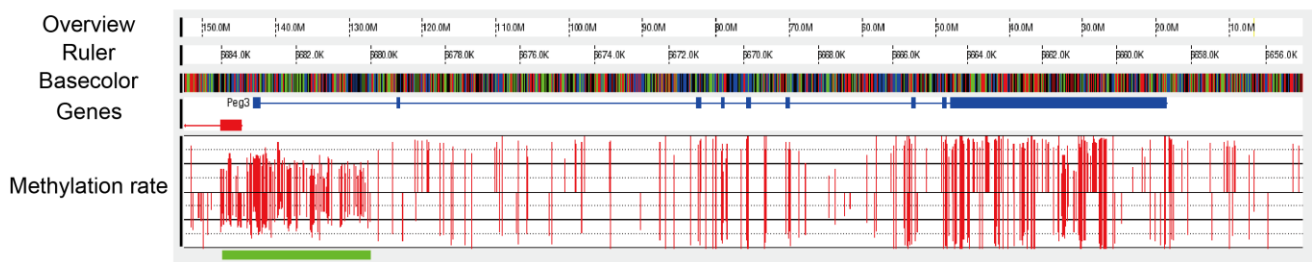

**Supplementary Figure S8.** Methylation status of mouse imprinted DMRs.

Browser shots were taken for the imprinted genes *H19*, *Peg10* and *Peg3*. Imprinted DMRs indicated by the green bars (23) showed ~50% methylation levels as expected, whereas other regions generally did higher methylation levels.

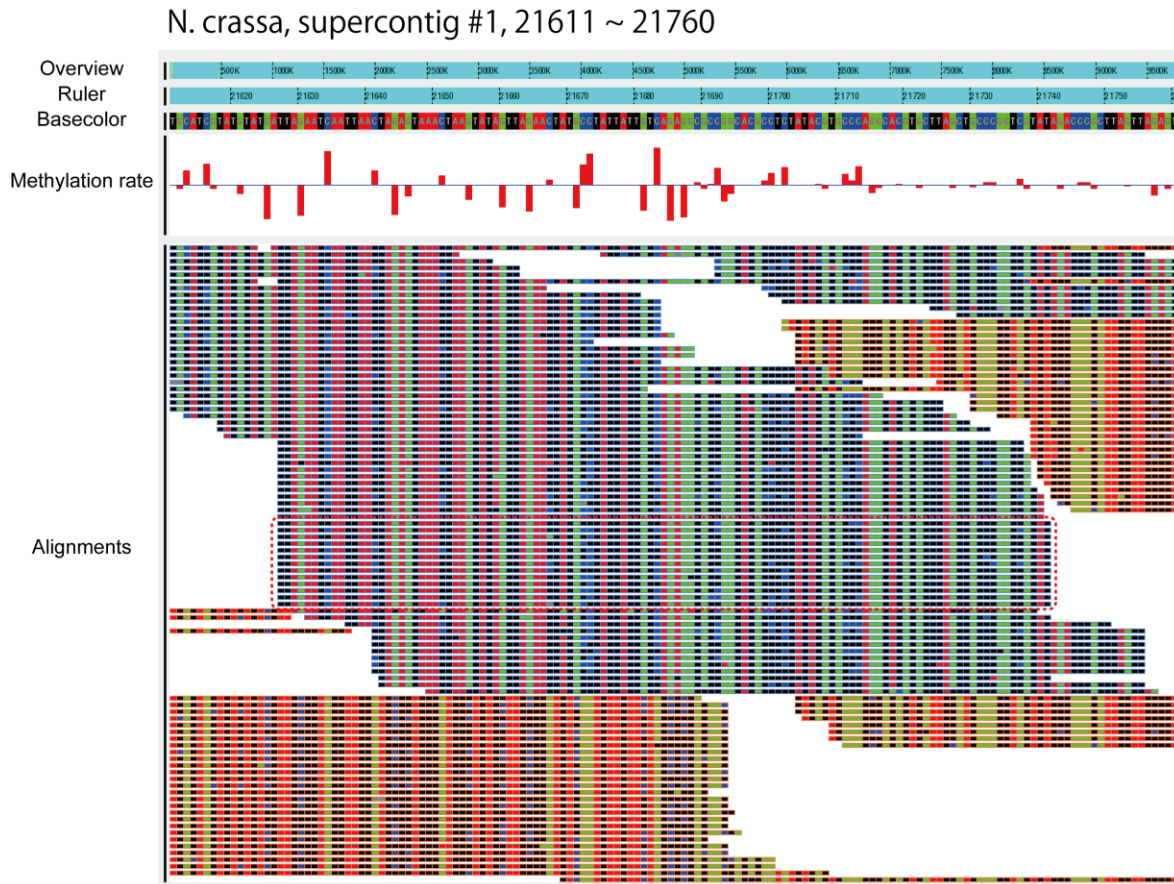

**Supplementary Figure S9.** An example of piled-up reads.

A browser shot was shown for an example of piled-up reads from the *N. crassa* data. The browser contained 5 tracks for overview, ruler, basecolor (nucleotide sequence), methylation rate and alignment. For the alignment track, reads mapped on top and bottom strands were shown as horizontal bars with blue and orange backgrounds, respectively. For both basecolor and alignment tracks, red, blue, green and black indicated A, C, G and T, respectively. The red dotted rounded rectangle indicated 13 piled-up reads. Notably, each of these 13 reads had a unique methylation pattern, indicating that these reads were all derived from independent DNA molecules and thus informative in estimating DNA methylation level.



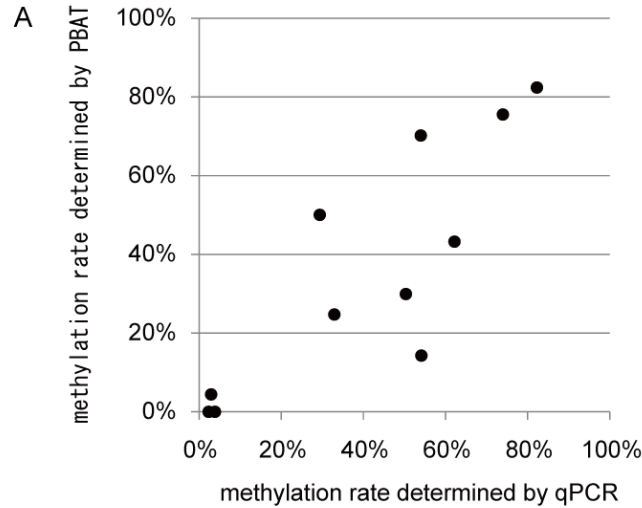

**B**

| forward primer                 | reverse primer                   | methylation rate determined by qPCR | methylation rate determined by PBAT |
|--------------------------------|----------------------------------|-------------------------------------|-------------------------------------|
| GAGTGATAATAAAAAGGAAGGGTAGACGG  | CTTTACTACCACTACATTACTCCCCG       | 54%                                 | 14%                                 |
| AATTGGCGTATTCTCGAAGGG          | TTGCTTAATGCCTGAGCCAC             | 82%                                 | 82%                                 |
| TAATTATTAAGCCGCGTACGAAG        | AACGGCGGTACTTTTATCGAG            | 74%                                 | 76%                                 |
| TTGCTTCTCCCTTACTTGAGCTT        | TGACCAACTTTCCTGCATCTAGTG         | 3%                                  | 4%                                  |
| TTTTGTGTCGAACTAGGCGTAGG        | TGTAATTTTCTGGTACTGTTCCCTC        | 2%                                  | 0%                                  |
| TGTC AAGCTGAAAATTAAGGGGAG      | AAAAACACAAAAACAACGTTCTAGAC       | 4%                                  | 0%                                  |
| ACTACTAAATGAACGTTACTTCCGCAAAGA | ATAAATTACGGCGGGACCTTTATTAGT      | 33%                                 | 25%                                 |
| ATTGAAGATTCTAAAGAGGAAGGCTATC   | TGCGGTTTCTTTATAATTAATTTCTCC      | 62%                                 | 43%                                 |
| TGGTAGAAGACTTCATTAAGCAGATAAGGA | GTTAATTAATACCAGCCGGCTTCTAAG      | 29%                                 | 50%                                 |
| GAATCTAAAAGGGCGTACAAATAAAGGATT | CCCGCTACTATACTATTGGACTAATTCTACGA | 50%                                 | 30%                                 |
| AACCTTATTAGTCTAAGGGAGGCTCCTAAT | CGCTGGATTTATATATTCTCGTGATTTAGC   | 54%                                 | 70%                                 |

**Supplementary Figure S10.** Validation of methylation levels estimated by the PBAT data.

**(A)** Correlation between the methylation levels estimated from the PBAT and qPCR data ( $R = 0.84$ ). We selected 11 GATC sites from the *Neurospora* genome and compared their methylation levels estimated by the PBAT data with those determined by a methylation-sensitive restriction enzyme-mediated qPCR assay. For the latter assay, the same genomic DNA used for PBAT was digested with BfuCI (NEB), which cuts GATC if the C is not methylated, and used as a template for qPCR amplification of the 11 sites. We quantified the amount of DNA refractory to BfuCI digestion using serially diluted intact genomic DNAs as a standard. We confirmed that all the 11 sites can be digested with >99% efficiency by MboI, a methylation-insensitive isoschizomer of BfuCI.

**(B)** Primer sequences used for the qPCR of the 11 GATC sites and the methylation levels estimated by the two methods.

## Supplementary Table S1. Summary of PBAT method on *Neurospora crassa*

### A. Mapping Summary

| Method | Amount of starting DNA | Global amplification | Number of reads                             |                      |                       |                     |                       |
|--------|------------------------|----------------------|---------------------------------------------|----------------------|-----------------------|---------------------|-----------------------|
|        |                        |                      | Data source                                 | Total                | Uniquely mapped       | Multiply mapped     | Unmapped              |
| PBAT   | 100 ng                 | no                   | DDBJ DRX000759<br>(116-nt single-end reads) | 47,126,874<br>(100%) | 27,880,723<br>(59.2%) | 1,179,036<br>(2.5%) | 18,067,115<br>(38.3%) |
| PBAT   | 250 pg                 | no                   | DDBJ DRX000760<br>(116-nt single-end reads) | 7,218,087<br>(100%)  | 4,038,843<br>(56.0%)  | 188,458<br>(2.6%)   | 2,990,786<br>(41.4%)  |
| PBAT   | 125 pg                 | no                   | DDBJ DRX000761<br>(116-nt single-end reads) | 5,338,759<br>(100%)  | 2,194,304<br>(41.1%)  | 127,582<br>(2.4%)   | 3,016,873<br>(56.5%)  |

### B. PBAT, *N. crassa*, starting from 100 ng DNA

|                     | Target region (nt) | Mapped region (nt) | % coverage | Read amount (nt) | Fold-coverage |
|---------------------|--------------------|--------------------|------------|------------------|---------------|
| supercont10.1       | 9,798,893          | 9,781,379          | 99.8%      | 712,186,061      | 72.7x         |
| supercont10.2       | 4,478,683          | 4,465,945          | 99.7%      | 313,524,054      | 70.0x         |
| supercont10.3       | 5,274,802          | 5,260,804          | 99.7%      | 378,140,045      | 71.7x         |
| supercont10.4       | 6,000,761          | 5,988,989          | 99.8%      | 424,175,265      | 70.7x         |
| supercont10.5       | 6,436,246          | 6,424,874          | 99.8%      | 464,494,872      | 72.2x         |
| supercont10.6       | 4,218,384          | 4,208,723          | 99.8%      | 296,007,027      | 70.2x         |
| supercont10.7       | 4,255,303          | 4,243,442          | 99.7%      | 297,661,272      | 70.0x         |
| supercont10.8~10.20 | 574,466            | 565,223            | 98.4%      | 95,272,576       | 165.8x        |
| supercont10.21      | 64,840             | 64,836             | 100.0%     | 42,324,056       | 652.7x        |
| total               | 41,102,378         | 41,004,215         | 99.8%      | 3,023,785,228    | 73.6x         |

### C. PBAT, *N. crassa*, starting from 250 pg DNA

|                     | Target region (nt) | Mapped region (nt) | % coverage | Read amount (nt) | Fold-coverage |
|---------------------|--------------------|--------------------|------------|------------------|---------------|
| supercont10.1       | 9,798,893          | 9,643,500          | 98.4%      | 104,559,426      | 10.7x         |
| supercont10.2       | 4,478,683          | 4,395,295          | 98.1%      | 46,430,594       | 10.4x         |
| supercont10.3       | 5,274,802          | 5,187,064          | 98.3%      | 55,981,290       | 10.6x         |
| supercont10.4       | 6,000,761          | 5,885,704          | 98.1%      | 62,389,747       | 10.4x         |
| supercont10.5       | 6,436,246          | 6,337,448          | 98.5%      | 68,761,967       | 10.7x         |
| supercont10.6       | 4,218,384          | 4,144,696          | 98.3%      | 44,020,521       | 10.4x         |
| supercont10.7       | 4,255,303          | 4,162,441          | 97.8%      | 43,910,468       | 10.3x         |
| supercont10.8~10.20 | 574,466            | 527,298            | 91.8%      | 13,697,912       | 23.8x         |
| supercont10.21      | 64,840             | 64,786             | 99.9%      | 5,711,236        | 88.1x         |
| total               | 41,102,378         | 40,348,232         | 98.2%      | 445,463,161      | 10.8x         |

### D. PBAT, *N. crassa*, starting from 125 pg DNA

|                     | Target region (nt) | Mapped region (nt) | % coverage | Read amount (nt) | Fold-coverage |
|---------------------|--------------------|--------------------|------------|------------------|---------------|
| supercont10.1       | 9,798,893          | 9,377,222          | 95.7%      | 56,712,925       | 5.8x          |
| supercont10.2       | 4,478,683          | 4,265,067          | 95.2%      | 25,285,068       | 5.6x          |
| supercont10.3       | 5,274,802          | 5,051,590          | 95.8%      | 30,124,795       | 5.7x          |
| supercont10.4       | 6,000,761          | 5,710,953          | 95.2%      | 33,670,644       | 5.6x          |
| supercont10.5       | 6,436,246          | 6,173,848          | 95.9%      | 37,159,647       | 5.8x          |
| supercont10.6       | 4,218,384          | 4,022,675          | 95.4%      | 23,702,042       | 5.6x          |
| supercont10.7       | 4,255,303          | 4,033,518          | 94.8%      | 23,766,532       | 5.6x          |
| supercont10.8~10.20 | 574,466            | 475,662            | 82.8%      | 7,457,340        | 13.0x         |
| supercont10.21      | 64,840             | 64,628             | 99.7%      | 3,056,827        | 47.1x         |
| total               | 41,102,378         | 39,175,163         | 95.3%      | 240,935,820      | 5.9x          |

## Supplementary Table S2. Comparison between MethylC-Seq and PBAT data for *Arabidopsis thaliana*

### A. Mapping Summary

| Method                                                 | Amount of starting DNA | Global amplification | <sup>a</sup> Number of reads                                   |                       |                       |                       |                       |
|--------------------------------------------------------|------------------------|----------------------|----------------------------------------------------------------|-----------------------|-----------------------|-----------------------|-----------------------|
|                                                        |                        |                      | Data source                                                    | Total                 | Uniquely mapped       | Multiply mapped       | Unmapped              |
| MethylC-Seq, 18 cycles of PCR amplification            | 5.0 µg                 | 18 cycles of PCR     | NCBI SRA SRX002495<br>(56-nt, single-end reads)                | 144,409,810<br>(100%) | 64,368,550<br>(44.6%) | 34,017,037<br>(23.6%) | 46,024,223<br>(31.9%) |
| MethylC-Seq, 4cycles of PCR amplification <sup>b</sup> | 2.0 µg                 | 4 cycles of PCR      | NCBI SRA SRX096408<br>(101-nt, single-end reads)               | 55,500,000<br>(100%)  | 33,226,080<br>(59.9%) | 21,738,815<br>(39.2%) | 535,105<br>(1.0%)     |
| PBAT                                                   | 0.1 µg                 | no                   | DDBJ DRX000762, DRX000763<br>(76- and 121-nt single-end reads) | 78,490,558<br>(100%)  | 35,858,373<br>(45.7%) | 21,065,230<br>(26.8%) | 21,566,955<br>(27.5%) |

<sup>a</sup>MethylC-Seq data and PBAT data were aligned to the reference genome using the same mapping method.

<sup>b</sup>To adjust depth of reads among three datasets, number of reads for this dataset is reduced appropriately.

### B. MethylC-Seq data, 18 cycles of PCR amplification

|          | Target region (nt) | Mapped region (nt) | % coverage | Read amount (nt) | Fold-coverage |
|----------|--------------------|--------------------|------------|------------------|---------------|
| Chr1     | 30,432,563         | 28,185,315         | 92.6%      | 745,754,763      | 24.5x         |
| Chr2     | 19,705,359         | 18,564,020         | 94.2%      | 506,702,890      | 25.7x         |
| Chr3     | 23,470,805         | 22,240,386         | 94.8%      | 632,407,216      | 26.9x         |
| Chr4     | 18,585,042         | 17,532,356         | 94.3%      | 482,623,520      | 26.0x         |
| Chr5     | 26,992,728         | 25,340,318         | 93.9%      | 704,554,348      | 26.1x         |
| subtotal | 119,186,497        | 111,862,395        | 93.9%      | 3,072,042,737    | 25.8x         |
| ChrC     | 154,478            | 153,325            | 99.3%      | 103,370,020      | 669.2x        |
| ChrM     | 366,924            | 236,875            | 64.6%      | 47,131,394       | 128.5x        |
| total    | 119,707,899        | 112,252,595        | 93.8%      | 3,222,544,151    | 26.9x         |

### C. MethylC-Seq data, 4 cycles of PCR amplification

|          | Target region (nt) | Mapped region (nt) | % coverage | Read amount (nt) | Fold-coverage |
|----------|--------------------|--------------------|------------|------------------|---------------|
| Chr1     | 30,432,563         | 28,762,007         | 94.5%      | 680,259,131      | 22.4x         |
| Chr2     | 19,705,359         | 19,000,346         | 96.4%      | 503,131,040      | 25.5x         |
| Chr3     | 23,470,805         | 22,739,791         | 96.9%      | 615,619,374      | 26.2x         |
| Chr4     | 18,585,042         | 17,971,162         | 96.7%      | 477,216,317      | 25.7x         |
| Chr5     | 26,992,728         | 25,898,974         | 95.9%      | 666,745,499      | 24.7x         |
| subtotal | 119,186,497        | 114,372,280        | 96.0%      | 2,942,971,361    | 24.7x         |
| ChrC     | 154,478            | 152,542            | 98.7%      | 332,278,909      | 2151.0x       |
| ChrM     | 366,924            | 192,065            | 52.3%      | 27,567,979       | 75.1x         |
| total    | 119,707,899        | 114,716,887        | 95.8%      | 3,302,818,249    | 27.6x         |

### D. PBAT data

|          | Target region (nt) | Mapped region (nt) | % coverage | Read amount (nt) | Fold-coverage |
|----------|--------------------|--------------------|------------|------------------|---------------|
| Chr1     | 30,432,563         | 28,964,599         | 95.2%      | 677,020,538      | 22.2x         |
| Chr2     | 19,705,359         | 19,154,222         | 97.2%      | 494,748,707      | 25.1x         |
| Chr3     | 23,470,805         | 22,857,598         | 97.4%      | 579,509,137      | 24.7x         |
| Chr4     | 18,585,042         | 18,085,050         | 97.3%      | 455,923,222      | 24.5x         |
| Chr5     | 26,992,728         | 26,060,744         | 96.5%      | 640,243,634      | 23.7x         |
| subtotal | 119,186,497        | 115,122,213        | 96.6%      | 2,847,445,238    | 23.9x         |
| ChrC     | 154,478            | 154,236            | 99.8%      | 434,947,984      | 2815.6x       |
| ChrM     | 366,924            | 252,398            | 68.8%      | 140,215,255      | 382.1x        |
| total    | 119,707,899        | 115,528,847        | 96.5%      | 3,422,608,477    | 28.6x         |

**Supplementary Table S3. Mapping summary of mouse astrocyte and human IMR90 cell**

A. Mapping Summary

| Method      | Sample            | Amount of starting DNA | Global amplification | Data source                                     | <sup>a</sup> Number of reads |                        |                      |                        |
|-------------|-------------------|------------------------|----------------------|-------------------------------------------------|------------------------------|------------------------|----------------------|------------------------|
|             |                   |                        |                      |                                                 | Total                        | Uniquely mapped        | Multiply mapped      | Unmapped               |
| PBAT        | Mouse, astrocyte  | 0.1 µg                 | no                   | DDBJ DRX001198<br>(121-nt, single-end reads)    | 948,882,874<br>(100%)        | 614,791,432<br>(64.8%) | 52,652,359<br>(5.5%) | 281,439,083<br>(29.7%) |
| MethylC-Seq | Human, IMR90 cell | 5.0 µg                 | 4 cycles of PCR      | NCBI SRA SRX006783<br>(84-nt, single-end reads) | 1,335,097,975<br>(100%)      | 895,279,997<br>(67.1%) | 66,343,995<br>(5.0%) | 373,473,983<br>(28.0%) |

<sup>a</sup>PBAT and MethylC-Seq data were aligned to the reference genomes for mouse and human or mm9 and hg19 downloaded from UCSC, respectively, using the same mapping method.

B. PBAT, Mouse astrocyte

|          | Target region (nt) | Mapped region (nt) | % coverage | Read amount (nt) | Fold-coverage |
|----------|--------------------|--------------------|------------|------------------|---------------|
| chr1     | 197,195,432        | 177,982,244        | 90.3%      | 3,945,712,558    | 20.0x         |
| chr2     | 181,748,087        | 166,010,489        | 91.3%      | 6,564,637,897    | 36.1x         |
| chr3     | 159,599,783        | 144,374,386        | 90.5%      | 3,124,371,147    | 19.6x         |
| chr4     | 155,630,120        | 138,954,705        | 89.3%      | 3,164,955,396    | 20.3x         |
| chr5     | 152,537,259        | 136,150,979        | 89.3%      | 3,089,061,325    | 20.3x         |
| chr6     | 149,517,037        | 135,760,827        | 90.8%      | 3,098,043,639    | 20.7x         |
| chr7     | 152,524,553        | 126,469,768        | 82.9%      | 2,898,442,082    | 19.0x         |
| chr8     | 131,738,871        | 116,622,223        | 88.5%      | 2,659,977,368    | 20.2x         |
| chr9     | 124,076,172        | 113,910,380        | 91.8%      | 3,477,637,080    | 28.0x         |
| chr10    | 129,993,255        | 118,095,985        | 90.8%      | 2,602,983,062    | 20.0x         |
| chr11    | 121,843,856        | 113,098,603        | 92.8%      | 2,712,399,102    | 22.3x         |
| chr12    | 121,257,530        | 107,671,949        | 88.8%      | 2,997,849,828    | 24.7x         |
| chr13    | 120,284,312        | 108,070,795        | 89.8%      | 2,411,672,691    | 20.0x         |
| chr14    | 125,194,864        | 108,220,582        | 86.4%      | 2,385,049,700    | 19.1x         |
| chr15    | 103,494,974        | 93,972,710         | 90.8%      | 2,121,635,781    | 20.5x         |
| chr16    | 98,319,150         | 88,651,768         | 90.2%      | 1,935,827,154    | 19.7x         |
| chr17    | 95,272,651         | 85,375,315         | 89.6%      | 1,934,864,821    | 20.3x         |
| chr18    | 90,772,031         | 81,953,300         | 90.3%      | 1,833,347,022    | 20.2x         |
| chr19    | 61,342,430         | 55,110,221         | 89.8%      | 1,253,868,764    | 20.4x         |
| chrX     | 166,650,296        | 134,522,710        | 80.7%      | 2,365,963,375    | 14.2x         |
| chrY     | 15,902,555         | 1,684,888          | 10.6%      | 22,219,325       | 1.4x          |
| others*  | 70,853,964         | 13,498,262         | 19.1%      | 994,577,371      | 14.0x         |
| subtotal | 2,725,749,182      | 2,366,163,089      | 86.8%      | 57,595,096,488   | 21.1x         |
| chrM     | 16,299             | 16,299             | 100.0%     | 46,374,003       | 2845.2x       |
| total    | 2,725,765,481      | 2,366,179,388      | 86.8%      | 57,641,470,491   | 21.1x         |

\*chr1\_random, chr3\_random, chr4\_random, chr5\_random, chr7\_random, chr8\_random, chr9\_random, chr13\_random, chr16\_random, chr17\_random, chrX\_random, chrY\_random and chrUn\_random.

**Supplementary Table S3.** Mapping summary of mouse astrocyte and human IMR90 cell (continued)

C. MethylC-Seq, Human IMR90 cell

|          | Target region (nt) | Mapped region (nt) | % coverage | Read amount (nt) | Fold-coverage |
|----------|--------------------|--------------------|------------|------------------|---------------|
| chr1     | 249,250,621        | 214,492,462        | 86.1%      | 5,162,028,181    | 20.7x         |
| chr2     | 243,199,373        | 230,166,103        | 94.6%      | 5,568,334,321    | 22.9x         |
| chr3     | 198,022,430        | 189,211,270        | 95.6%      | 4,533,363,804    | 22.9x         |
| chr4     | 191,154,276        | 181,365,292        | 94.9%      | 4,434,910,420    | 23.2x         |
| chr5     | 180,915,260        | 170,758,054        | 94.4%      | 4,077,307,358    | 22.5x         |
| chr6     | 171,115,067        | 157,704,110        | 92.2%      | 3,878,772,331    | 22.7x         |
| chr7     | 159,138,663        | 149,053,303        | 93.7%      | 3,569,533,183    | 22.4x         |
| chr8     | 146,364,022        | 137,874,665        | 94.2%      | 3,296,570,468    | 22.5x         |
| chr9     | 141,213,431        | 109,325,541        | 77.4%      | 2,499,210,030    | 17.7x         |
| chr10    | 135,534,747        | 125,109,749        | 92.3%      | 3,236,651,159    | 23.9x         |
| chr11    | 135,006,516        | 126,937,413        | 94.0%      | 3,001,739,805    | 22.2x         |
| chr12    | 133,851,895        | 126,340,322        | 94.4%      | 3,000,790,537    | 22.4x         |
| chr13    | 115,169,878        | 93,167,349         | 80.9%      | 2,203,538,300    | 19.1x         |
| chr14    | 107,349,540        | 85,351,918         | 79.5%      | 1,998,010,411    | 18.6x         |
| chr15    | 102,531,392        | 76,764,322         | 74.9%      | 1,767,485,898    | 17.2x         |
| chr16    | 90,354,753         | 74,289,141         | 82.2%      | 1,750,961,698    | 19.4x         |
| chr17    | 81,195,210         | 73,415,226         | 90.4%      | 1,585,974,217    | 19.5x         |
| chr18    | 78,077,248         | 72,656,265         | 93.1%      | 1,806,048,752    | 23.1x         |
| chr19    | 59,128,983         | 52,721,013         | 89.2%      | 1,161,204,857    | 19.6x         |
| chr20    | 63,025,520         | 57,778,892         | 91.7%      | 1,320,105,083    | 20.9x         |
| chr21    | 48,129,895         | 33,705,892         | 70.0%      | 849,501,886      | 17.7x         |
| chr22    | 51,304,566         | 32,553,755         | 63.5%      | 643,874,248      | 12.6x         |
| chrX     | 155,270,560        | 141,070,120        | 90.9%      | 3,225,440,674    | 20.8x         |
| chrY     | 59,373,566         | 6,729,542          | 11.3%      | 134,466,236      | 2.3x          |
| others*  | 41,467,281         | 4,874,679          | 11.8%      | 430,030,730      | 10.4x         |
| subtotal | 3,137,144,693      | 2,723,416,398      | 86.8%      | 65,135,854,587   | 20.8x         |
| chrM     | 16,571             | 16,056             | 96.9%      | 59,483,414       | 3589.6x       |
| total    | 3,137,161,264      | 2,723,432,454      | 86.8%      | 65,195,338,001   | 20.8x         |

\*chr6\_apd\_hap1, chr6\_cox\_hap2, chr6\_dbb\_hap3, chr6\_mcf\_hap5, chr6\_qbl\_hap6, chr4\_ctg9\_hap1, chr6\_mann\_hap4, chr6\_ssto\_hap7, chrUn\_gl000211~chrUn\_gl000249, chr17\_ctg5\_hap1, chr1\_gl000191\_random, chr1\_gl000192\_random, chr4\_gl000193\_random, chr4\_gl000194\_random, chr7\_gl000195\_random, chr8\_gl000196\_random, chr8\_gl000197\_random, chr9\_gl000198\_random~chr9\_gl000201\_random, chr11\_gl000202\_random, chr17\_gl000203\_random~chr17\_gl000206\_random, chr18\_gl000207\_random, chr19\_gl000208\_random, chr19\_gl000209\_random and chr21\_gl000210\_random
